# Supplementary material for: STRAD pseudokinases regulate axogenesis and LKB1 stability
Source: PubMed Central journal article supplement (PMC4016016; doi:10.1186/1749-8104-9-5), 2014-03-04
Supplement: 1749-8104-9-5-S1.pdf [file 1749-8104-9-5-S1.pdf]

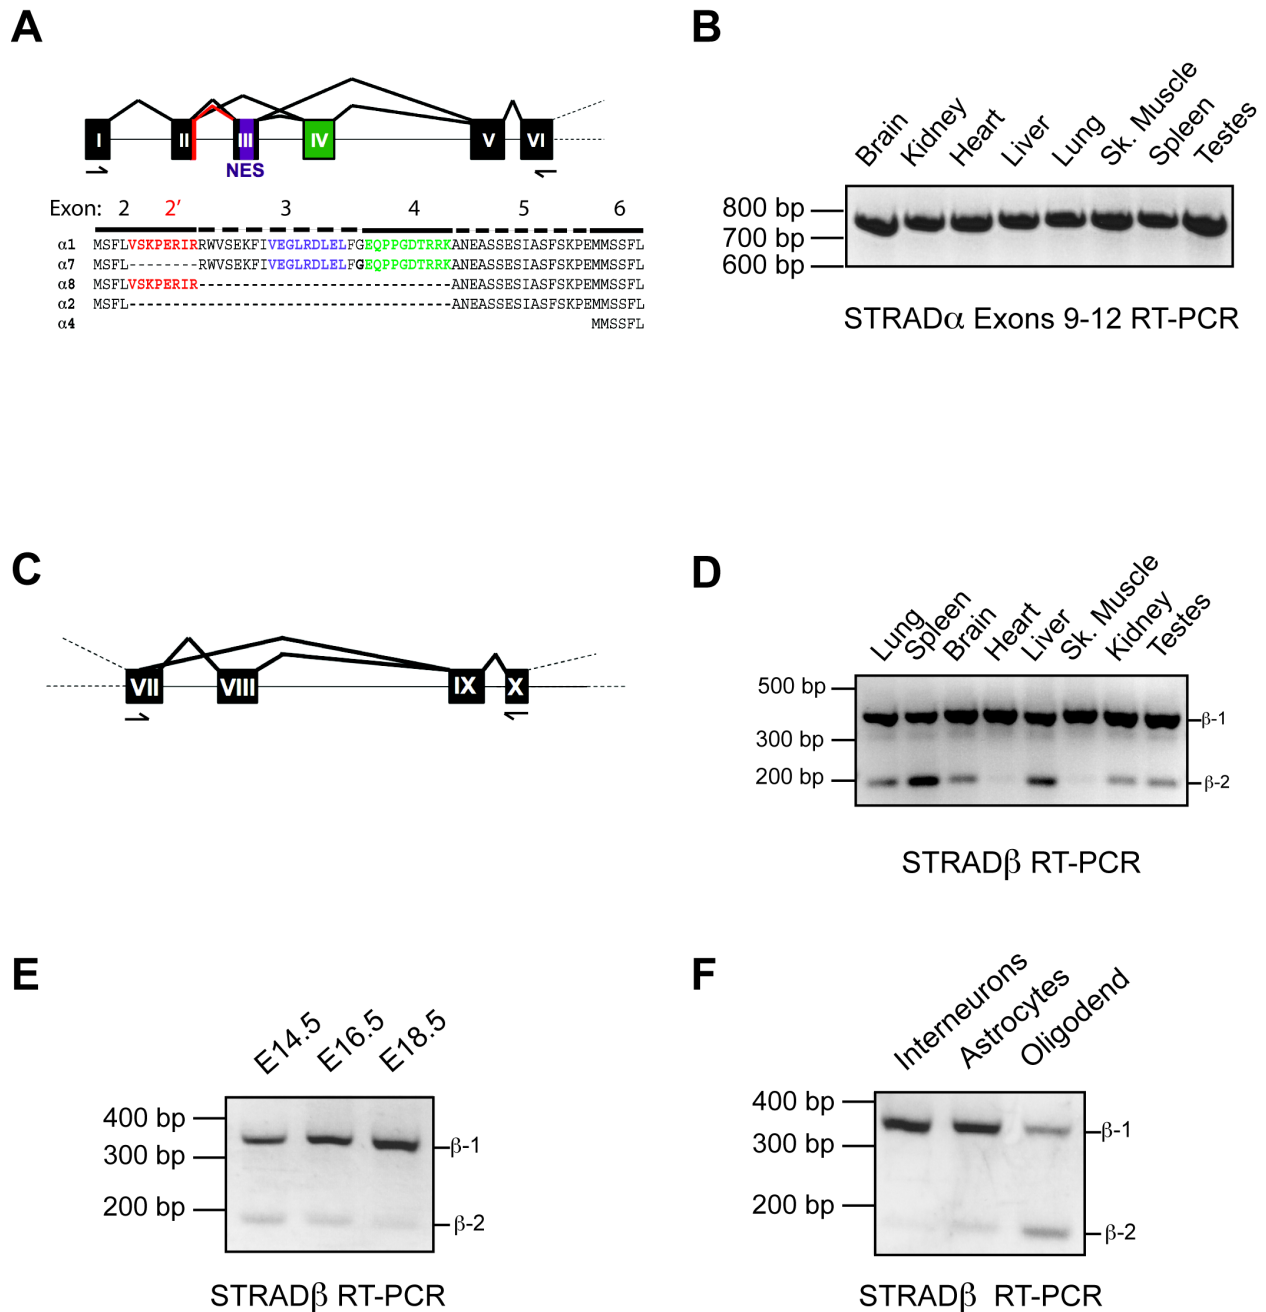

**Supplementary Figure 2 - STRAD splicing is developmentally regulated** (A) Amplicon sequencing indicates that at least five variants arise in the amino terminal domain of STRAD $\alpha$ . Arrows indicate RT-PCR primer placement. (B) RT-PCR of C-terminal STRAD $\alpha$  splicing (primers span exons 9-12) of STRAD in multiple tissues. (C) STRAD $\beta$  splicing diagram in which arrows denote primers. Exon 8 is skipped in STRAD $\beta$ -2 creating a premature stop codon and truncated mRNA. (D-F) STRAD $\beta$  RT-PCR (D) the only reported splicing variant for STRAD $\beta$  indicates that this splicing event occurs in all tissues except skeletal and cardiac muscle. (E) STRAD $\beta$  splicing across developmental time in E14.5-E18.5 cortex. (F) STRAD $\beta$  splice variant expression in primary cultured interneurons, astrocytes and oligodendrocytes.

### Supplemental Figure 3 - STRAD Gene Structure, Mutant and Conditional Alleles

(A) The human and mouse STRAD $\alpha$  genes consist of 13 exons and STRAD $\beta$  has 12. Schematic of the human PMSE Syndrome deletion eliminating exons 9-13. Schematic of the mouse STRAD $\alpha$  locus disrupted via insertional mutagenesis of a splice trap construct that eliminates gene expression and the conditional allele in which exons 7 and 8 are flanked by loxP sites. Schematic of the STRAD $\beta$  conditional allele in which exon 2 (which includes the start codon) is flanked by loxP sites. Black boxes indicate untranslated regions of exons and white boxes indicate the open reading frame. (B) Western blot demonstrating a loss of STRAD $\alpha$  expression in a STRAD $\alpha$ <sup>-/-</sup> E16.5 cortex, while

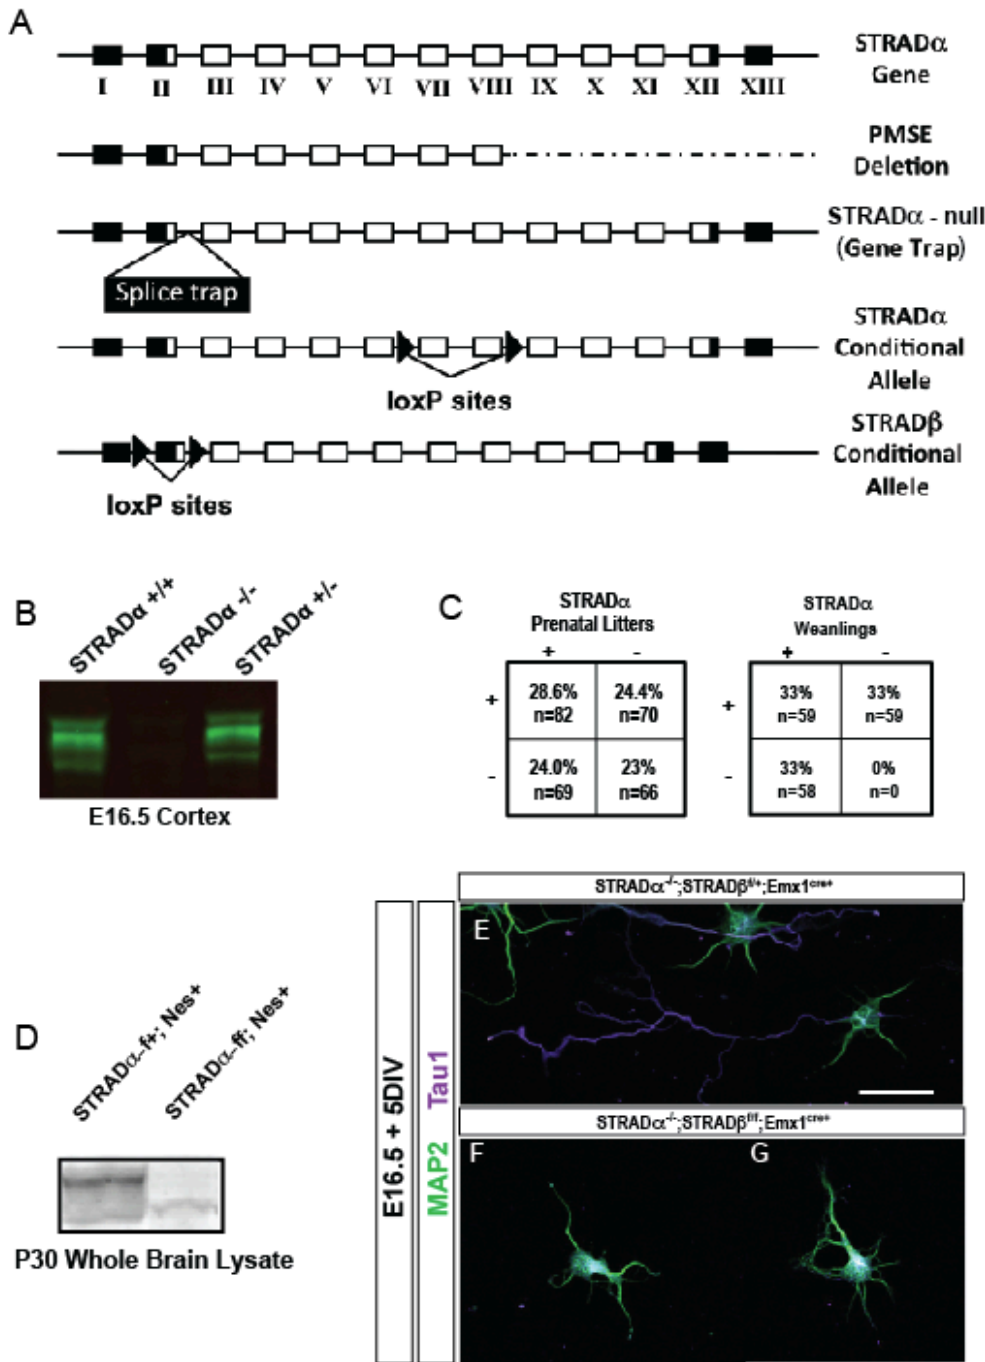

protein level is unchanged in STRAD $\alpha$ <sup>+/-</sup> cortex. (C) STRAD $\alpha$ <sup>-/-</sup> mice are not viable postnatally, while almost normal Mendelian ratios exist prenatally. (D) Western blot indicating loss of STRAD $\alpha$  protein in the P30 STRAD $\alpha$ <sup>ff</sup>; Nes-cre<sup>+</sup> cortex compared with STRAD $\alpha$ <sup>ff</sup>; Nes-cre<sup>+</sup> littermate. (E-G) Primary culture cortical neurons from embryonic day 16.5 mouse cortex grown for 5 days *in vitro* and immunolabeled for MAP2/Tau. Indeterminate neurites are seen in (F-G) STRAD $\alpha$ <sup>-/-</sup>; STRAD $\beta$ <sup>fl/fl</sup>; Emx1-cre<sup>+</sup> neurons but not in (E) STRAD $\alpha$ <sup>+/-</sup>; STRAD $\beta$ <sup>fl/fl</sup>; Emx1-cre<sup>+</sup>. Scale bar=20um.

## Supplemental Figure 4 – LKB1 Stability

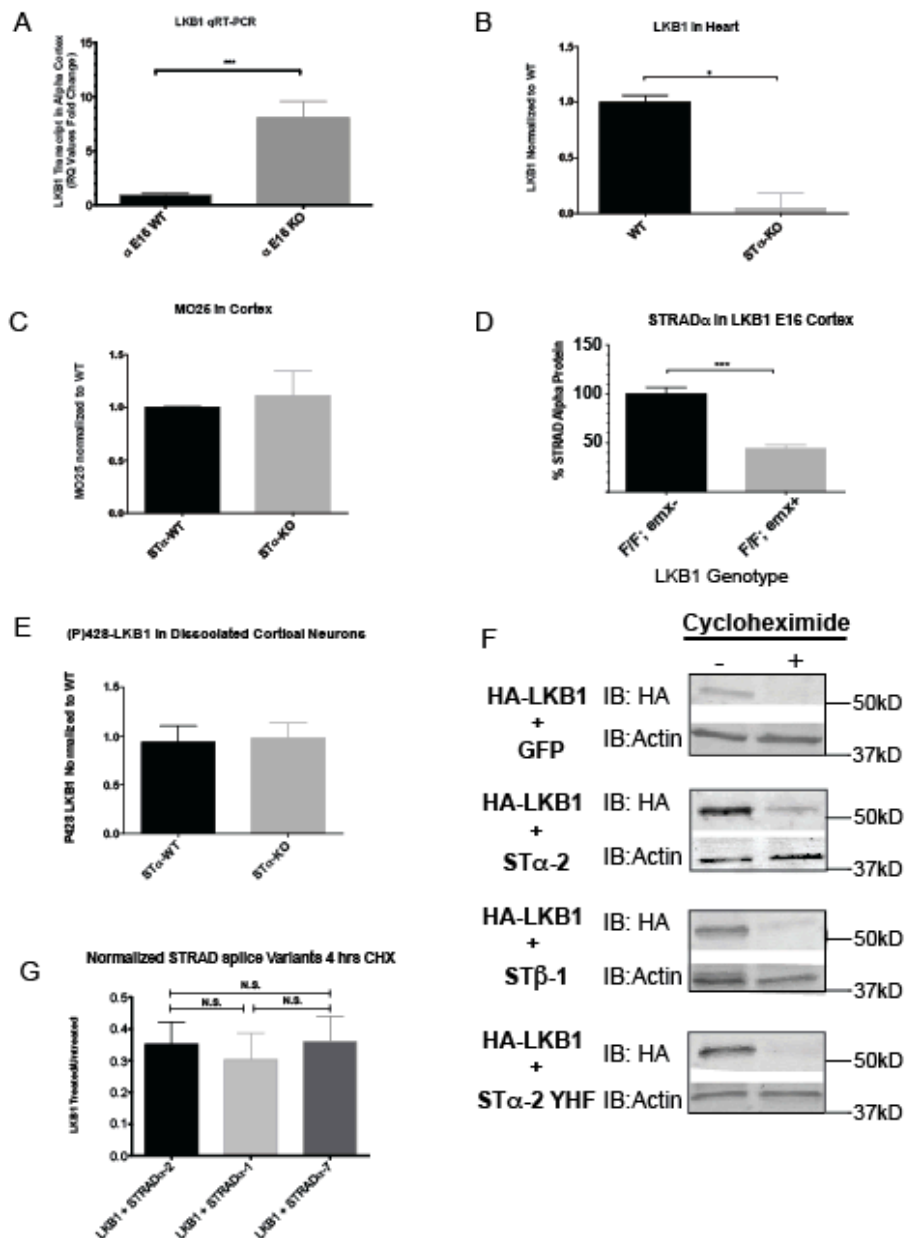

(A) Up-regulation of LKB1 mRNA in STRAD<sup>-/-</sup> (KO) E16.5 cortex relative to STRAD<sup>+/+</sup> (WT) as assessed by qRT-PCR. WT N=3, KO N=4 from 2 different litters. Quantification of Western blot replicates: (B) Significant destabilization of LKB1 protein in STRAD $\alpha$  KO E16.5 embryonic hearts. WT N=2, KO N=4 (C) MO25 levels are unchanged in STRAD $\alpha$  KO E16.5 cortex compared with WT. WT N=2, KO N=4. (D) STRAD $\alpha$  protein is destabilized in LKB1<sup>ff</sup>; Emx1-Cre<sup>+</sup> E16.5 cortex compared with littermate controls. N  $\geq$  10 cortices of each genotype from at least 3 litters. (A-D) Error bars represent SEM; \*p<0.05, \*\*\*p<0.001 by Student's T-test. (E) Quantification of western blot analysis of the levels of LKB1 phosphorylated at serine 428/431 in primary cultures derived from either control or STRAD $\alpha$ -null mice. (F) HEK293 cells were transfected with HA-tagged LKB1 and STRAD constructs. Representative Western blot anti-HA of untreated and 4hrs 50 $\mu$ M cycloheximide treated cells, with actin as a loading control. (G) Quantification and comparison of LKB1 stability following 50  $\mu$ M cycloheximide treatment when co-transfected with STRAD $\alpha$  splice variants STRAD $\alpha$ -2, -1 or -7.

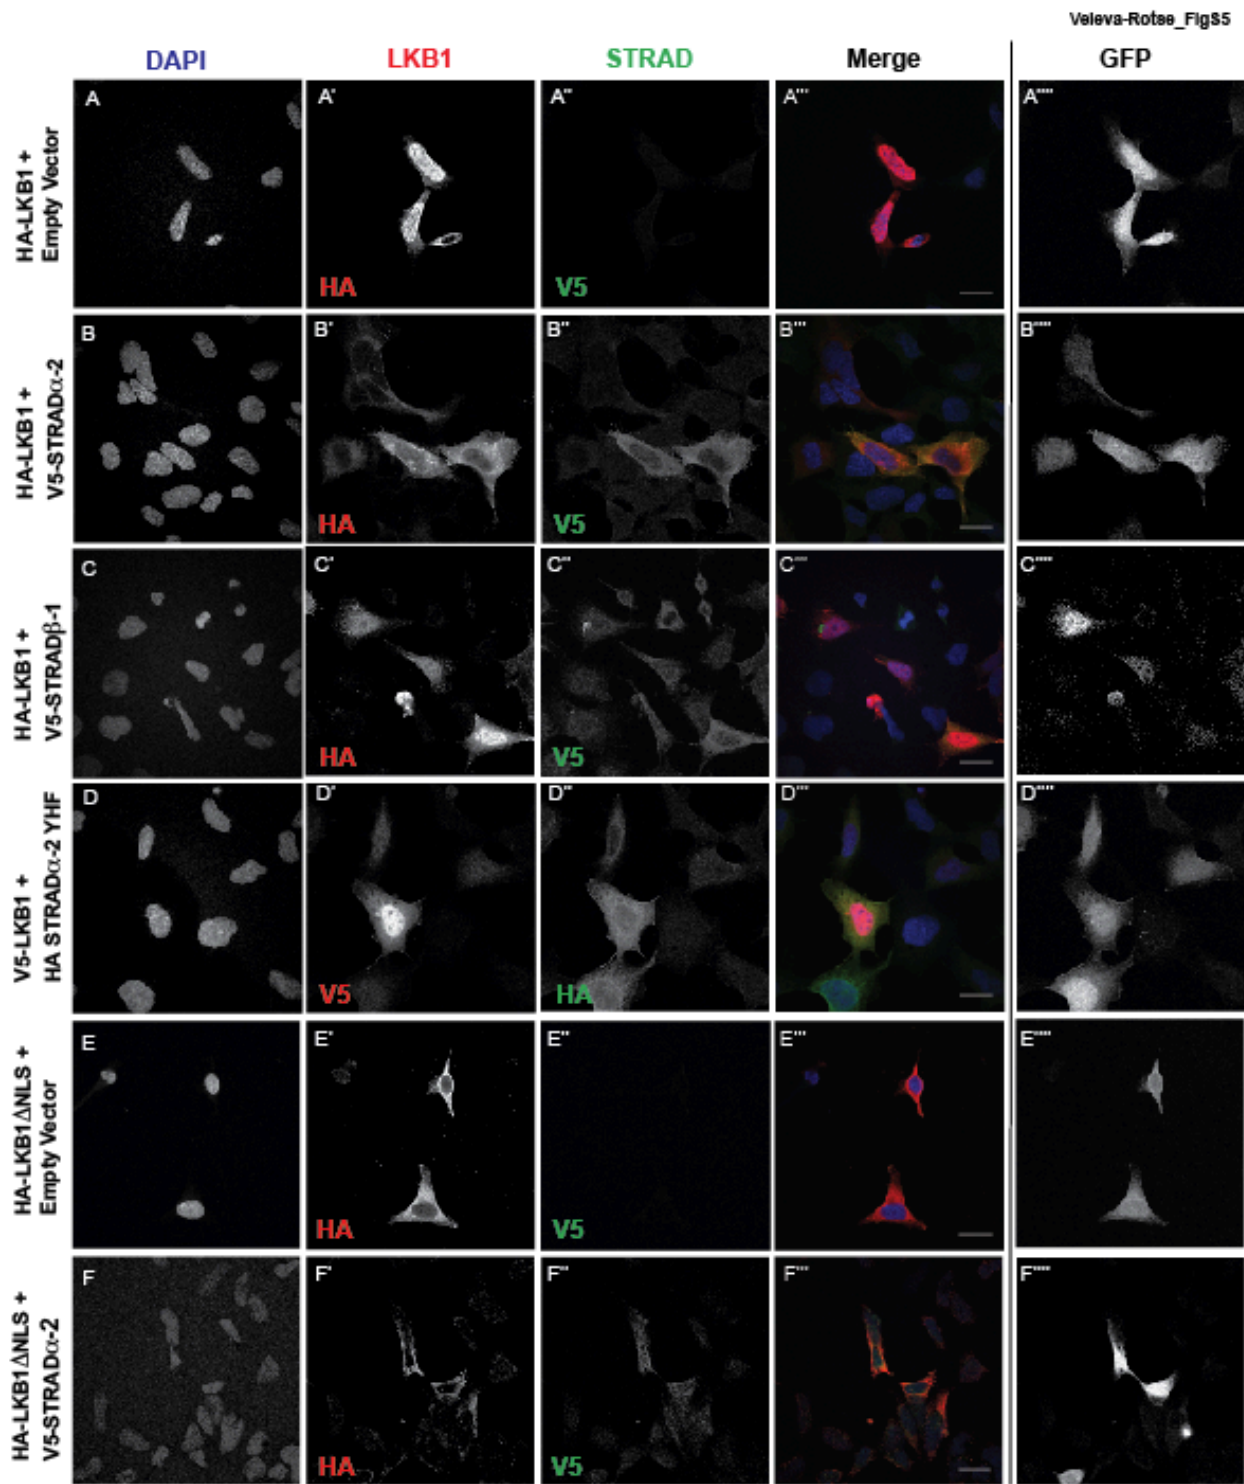

**Supplemental Figure 5 – Subcellular localization of epitope-tagged LKB1 and STRAD Variants**

Verification of subcellular localization for epitope-tagged LKB1 and STRAD constructs transiently transfected in HEK293 cells. (A-A'') LKB1+GFP-expressing empty vector, (B-B'') LKB1+STRAD $\alpha$ -2. (C-C'') LKB1+STRAD $\beta$ -1, (D-D'') The LKB1+STRAD $\alpha$ -2 YHF (LKB1 binding mutant), (E-E'') LKB1 $\Delta$ NLS+GFP-expressing empty vector (F-F'') LKB1 $\Delta$ NLS+STRAD $\alpha$ -2.

Table S1

| Target Protein         | Species   | Company        | Concentration Used |
|------------------------|-----------|----------------|--------------------|
| Actin                  | Mouse     | Millipore      | 1:10,000 (WB)      |
| Cleaved Caspase3       | Rabbit    | Cell Signaling | 1:1000 (IF)        |
| GFP                    | Chicken   | Aves           | 1:1000 (IF)        |
| LKB1 D60C5             | Rabbit    | Cell Signaling | 1:1000 (WB)        |
| MAP2                   | Rabbit    | Chemicon       | 1:10,000 (IF)      |
| MAP2                   | Chicken   | Covance        | 1:10,000 (IF)      |
| MO25 $\alpha$          | Rabbit    | Cell Signaling | 1:1000 (WB)        |
| STRAD $\alpha$         | Rabbit    | Sigma          | 1:1,000 (WB)       |
| Tag1                   | Mouse IgM | DSHB           | 1:50 (IF)          |
| Tau-1 Clone PC1C6      | Mouse     | Millipore      | 1:1,000 (IF)       |
| Tubulin ( $\beta$ III) | Mouse     | BD             | 1:1000 (IF)        |

Table of antibodies used.
